# Supplementary material for: Centromere transcription allows CENP-A to transit from chromatin association to stable incorporation
Source: PubMed Central journal article supplement (PMC5987708; doi:10.1083/jcb.201611087), 2018-06-04
Supplement: JCB_201611087_sm.pdf [file JCB_201611087_sm.pdf]

Supplemental material

Bobkov et al., <https://doi.org/10.1083/jcb.201611087>

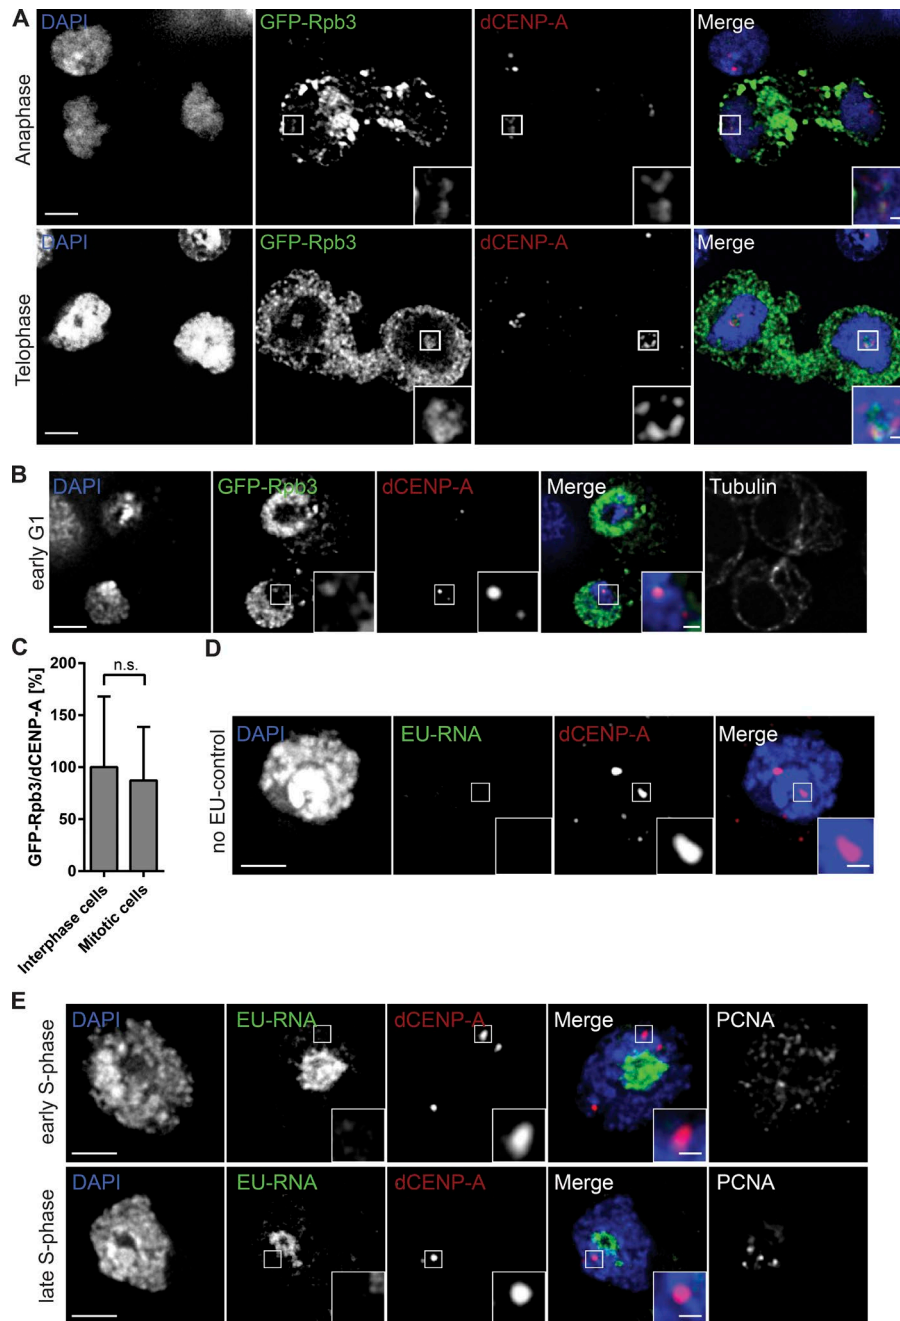

Figure S1. **RNAPII and centromere-associated transcripts are present at centromeres in late mitosis and early G1.** **(A)** Single optical section of fixed anaphase and telophase S2 cells expressing GFP-Rpb3 and immunostained for dCENP-A. Bar, 3  $\mu$ m. Boxes indicate the 3 $\times$  enlarged inset (bar, 0.5  $\mu$ m). **(B)** Single optical section of early G1 cell expressing GFP-Rpb3. Centromeres are marked by dCENP-A and the midbody by tubulin immunodetection. Bar, 3  $\mu$ m. Boxes indicate the 3 $\times$  enlarged inset (bar, 0.5  $\mu$ m). **(C)** Signal intensities of centromeric GFP-Rpb3 in interphase/mitotic cells with GFP-positive centromeres. As centromeres cluster in *Drosophila* during mitosis, measured signals were normalized to corresponding dCENP-A signals.  $n = 2$  replicates;  $n = 5-15$ . The p-value was determined using the Student's  $t$  test. **(D)** Single optical section of fixed S2 cell on which click-iT labeling was performed without EU treatment of the cell. Scaling for EU signal is exactly the same as in Fig. 2 B. Bar, 3  $\mu$ m. Boxes indicate the 3 $\times$  enlarged inset (bar, 0.5  $\mu$ m). **(E)** Single optical section of fixed S2 cells with nascent RNA production labeled by EU incorporation. PCNA staining served as a marker for S-phase, early S-phase (upper panel), and late S-phase (lower panel). Bar, 3  $\mu$ m. Boxes indicate the 3 $\times$  enlarged inset (bar, 0.5  $\mu$ m).

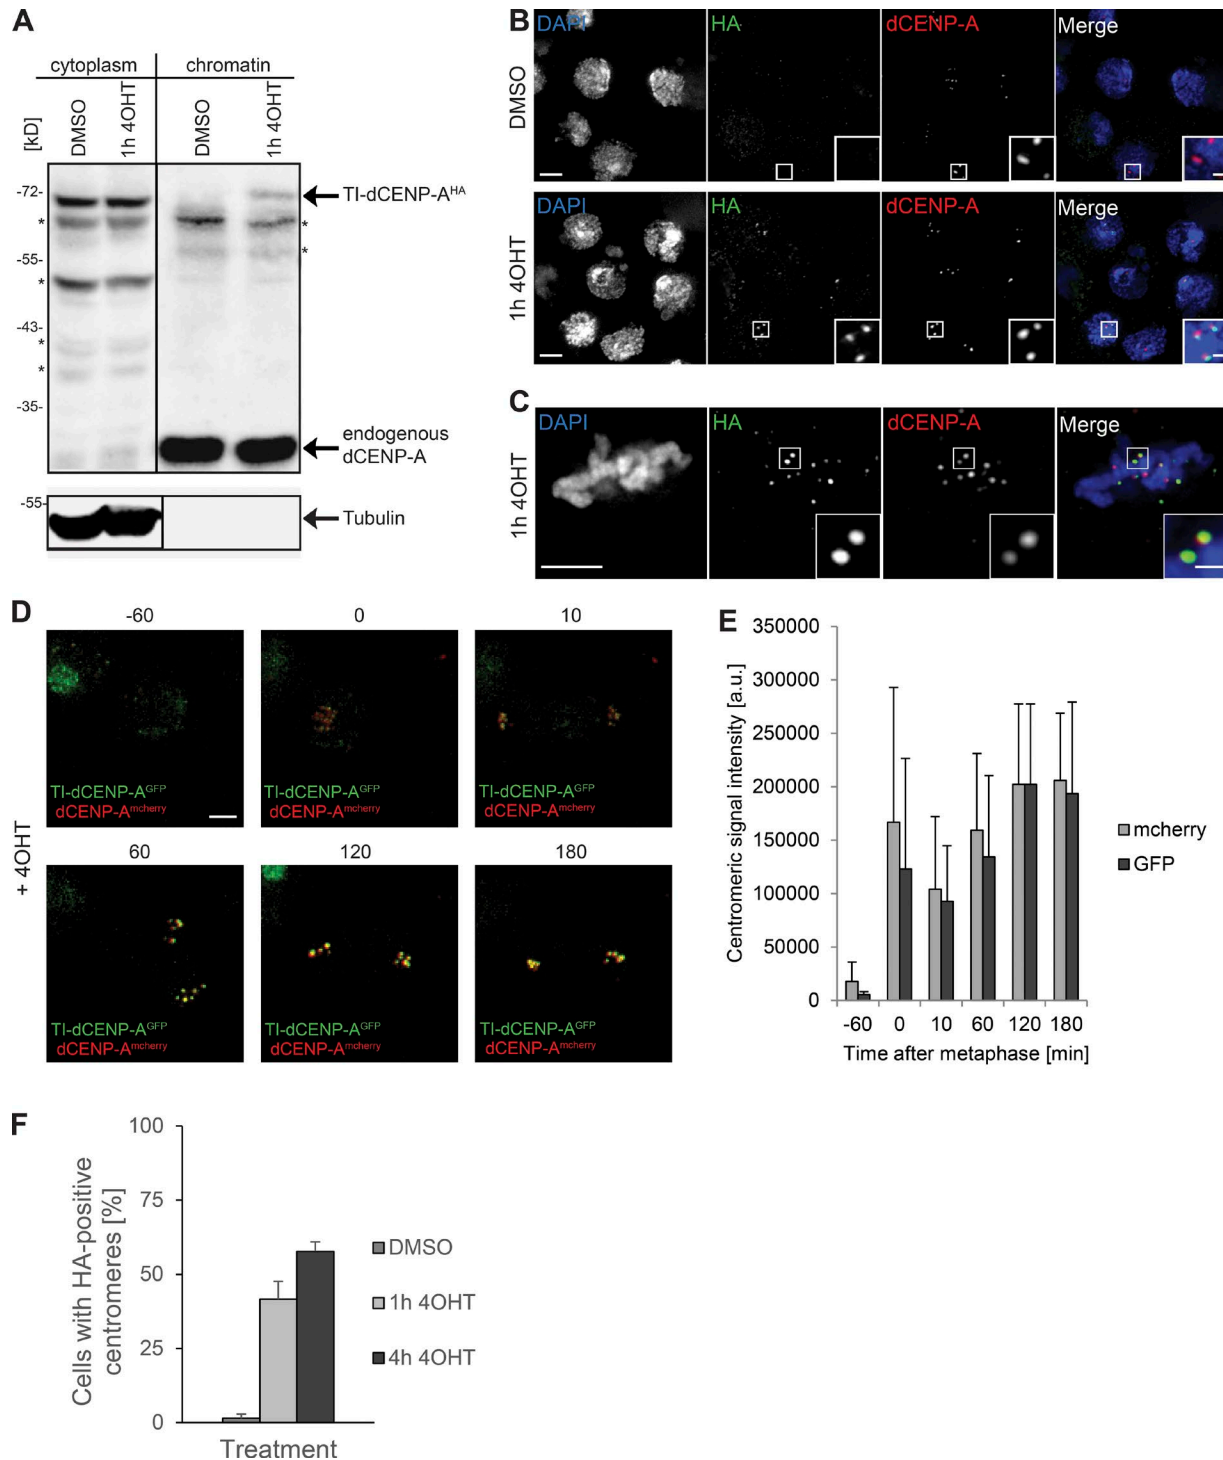

Figure S2. **aCENP-A loading system independent of acute transcription.** (A) Western blot analysis showing the incorporation of TI-dCENP-A<sup>HA</sup> into the chromatin fraction after addition of 4OHT. Arrows mark protein of interest, and asterisks (\*) mark unspecific bands or potential degradation products. (B) Maximum-intensity projection of IF images of fixed S2 cells stably expressing TI-dCENP-A<sup>HA</sup> and stained for HA and dCENP-A. Control cells (upper panel) and 4OHT-treated cells (lower panel) are shown. Bars, 3  $\mu$ m. Boxes indicate the 3 $\times$  enlarged inset (bars, 0.5  $\mu$ m). (C) Maximum-intensity projection of fixed metaphase S2 cell stably expressing TI-dCENP-A<sup>HA</sup> and stained for HA and total dCENP-A. Bar, 3  $\mu$ m. Boxes indicate the 3 $\times$  enlarged inset (bar, 0.5  $\mu$ m). (D) Live-cell imaging of cells stably expressing TI-dCENP-A<sup>GFP</sup> and pictured before the first incorporation of transiently expressed dCENP-A<sup>mCherry</sup>. Cells were treated with 4OHT to trigger the release of TI-dCENP-A<sup>GFP</sup>. Numbers above pictures indicate minutes before/after metaphase. Bar, 3  $\mu$ m. (E) Quantification of cells exemplified in D. *n* = 2 replicates; *n* = 5 cells; data are mean + SD. (F) Quantification of the amount of cells that respond to 4OHT treatment with localization of TI-dCENP-A<sup>HA</sup> to centromeres. *n* = 2 replicates; *n* = 100–200 cells; data are mean + SD.

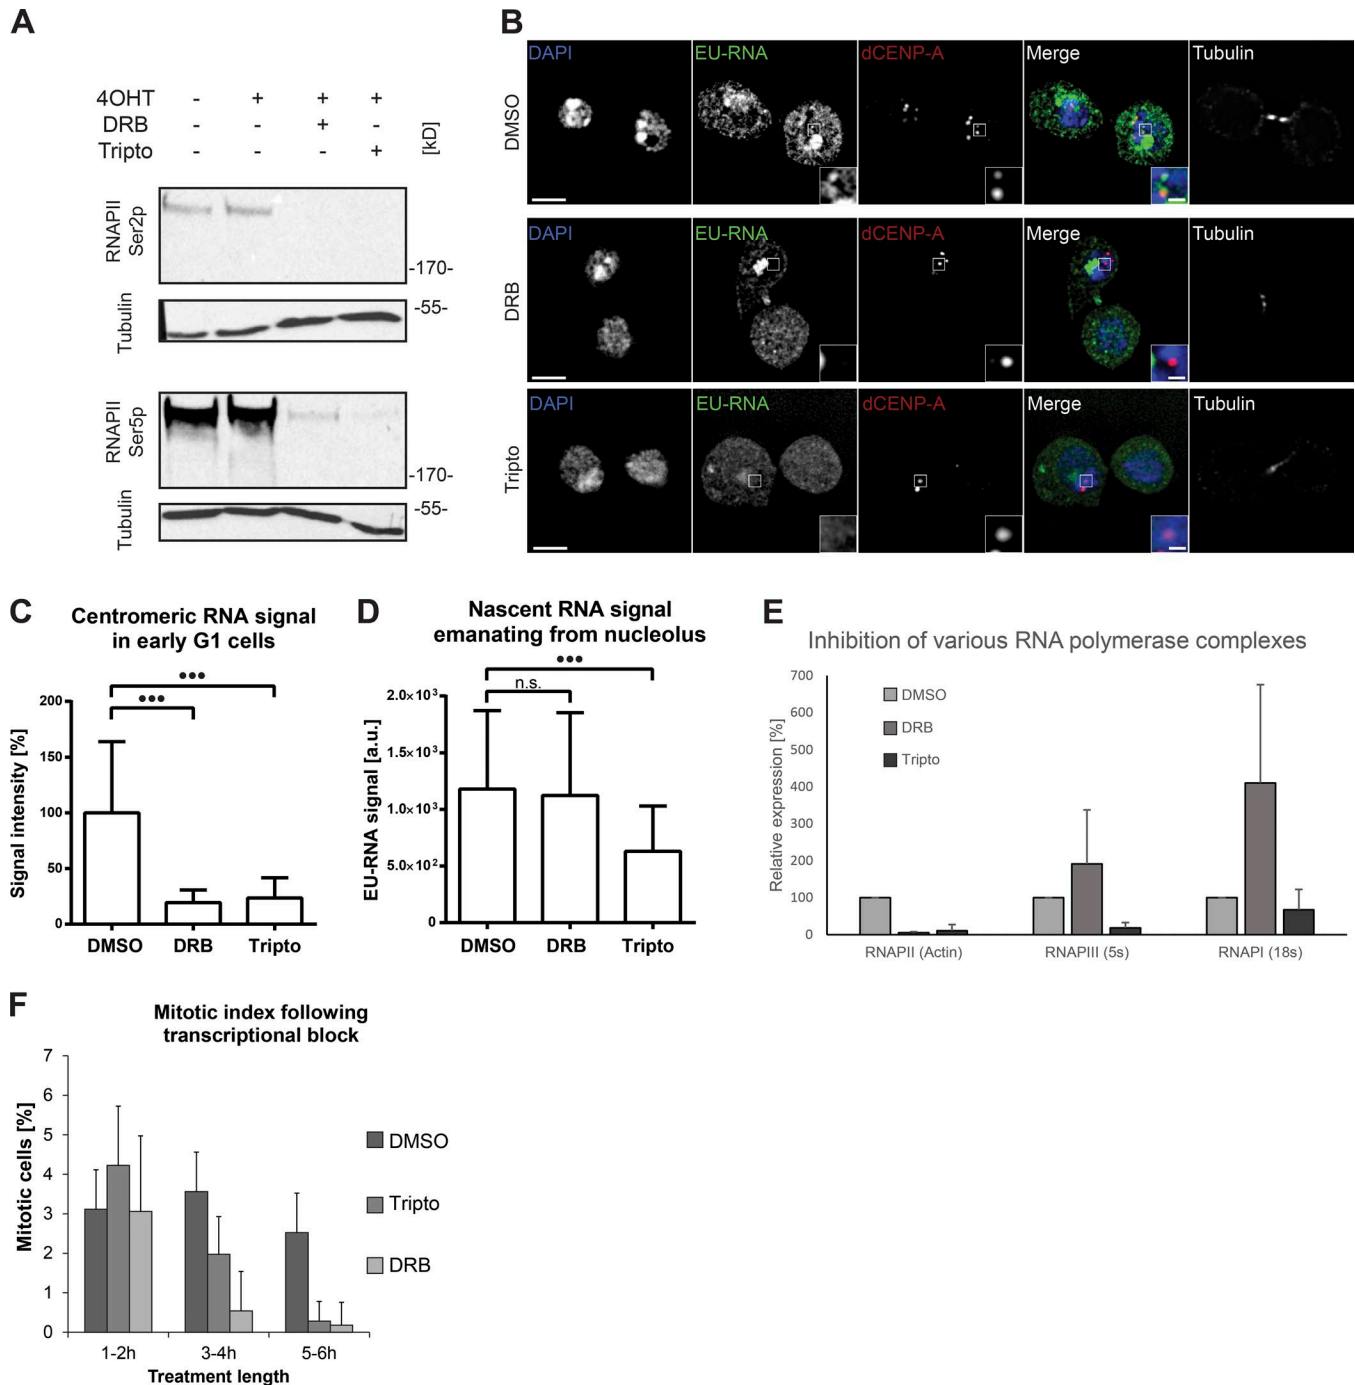

Figure S3. **Nascent centromeric transcripts are produced by RNAPII.** (A) Western blot demonstrating the reduction of phosphorylation of RNAPIISer2 and RNAPIISer5 by the inhibitor treatment. (B) Single optical section of early G1 cells with nascent RNA production labeled by EU incorporation. Centromeres are marked by dCENP-A and the midbody by tubulin immunodetection. Control and inhibitor treated cells are shown. Bars, 3  $\mu$ m. Boxes indicate the 3 $\times$  enlarged inset (bars, 0.5  $\mu$ m). (C and D) Quantification of centromeric RNA signals (C) and nucleolar RNA signals (D) in cells exemplified in B.  $n = 3$  replicates;  $n = 10$  cells; data are mean + SD. The  $p$ -value was determined using Student's  $t$  test. **\*\*\***,  $P \leq 0.001$ . (E) qPCR showing the relative expression of marker genes for RNAPI–III in control and inhibitor-treated cells. Note that in the absence of RNAPII transcripts in the DRB sample, RNAPI and RNAPIII transcripts are highly overrepresented.  $n = 3$  replicates. Data are normalized to expression in control treated cells and represented as mean + SD. (F) Quantification of the amount of cells that enter mitosis upon transcriptional inhibition. No mitotic arrest is induced by the inhibitor treatment.  $n = 3$  replicates,  $n = 400$ –750 cells; data are mean + SD.

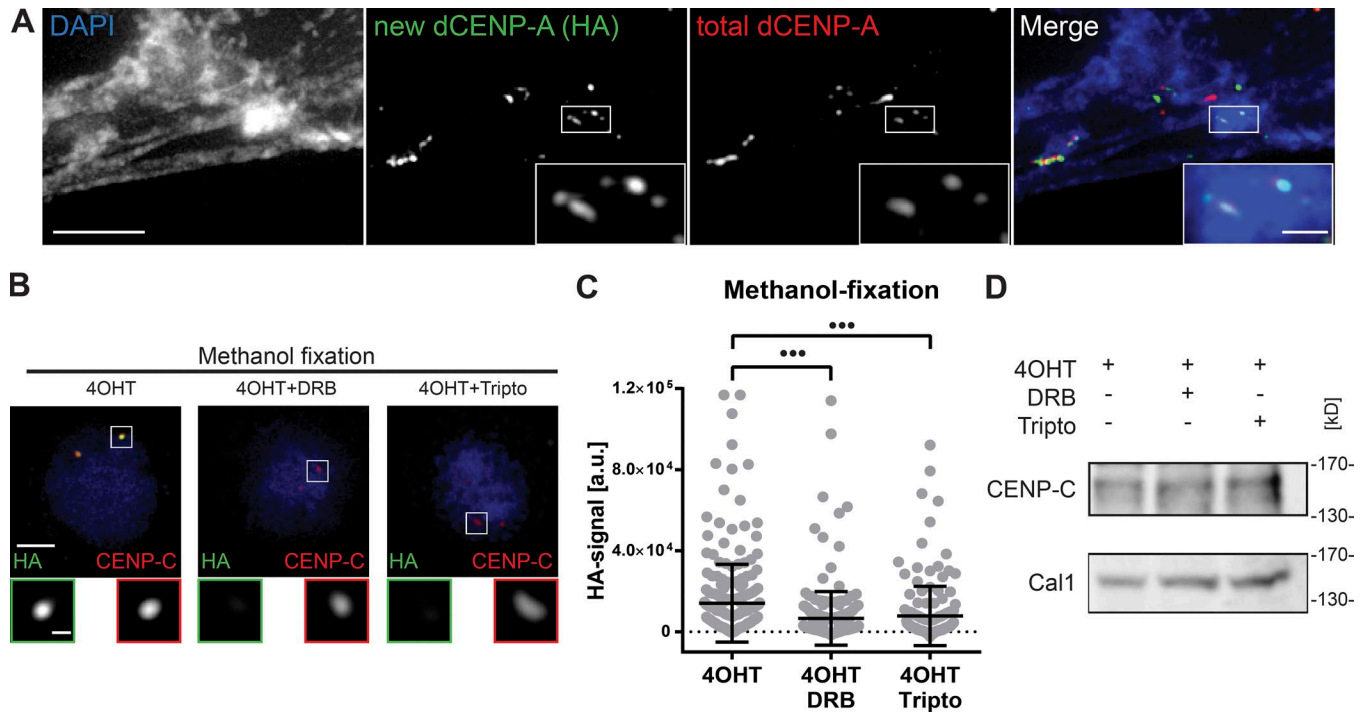

Figure S4. **Transcriptional inhibition prevents stabilization of new dCENP-A.** (A) Maximum-intensity projection displaying the retention of new dCENP-A in cells with least preserved nuclear integrity. dCENP-A staining served as a marker for centromeres. Bar, 3  $\mu$ m. Boxes indicate the 3 $\times$  enlarged inset (bar, 0.5  $\mu$ m). (B) Maximum-intensity projection of cell stably expressing TI-dCENP-A<sup>HA</sup> fixed in methanol. Respective treatments are indicated above each picture. Bar, 3  $\mu$ m. 3 $\times$  magnification of boxed area is shown below (TI-dCENP-A<sup>HA</sup> [green] and dCENP-C [red]; bar, 0.5  $\mu$ m). (C) Quantification of pictures exemplified in B.  $n = 3$  replicates,  $n = 30$ –75 cells; data are mean  $\pm$  SD. The p-value was determined using Kolmogorov–Smirnov test. **\*\*\***,  $P \leq 0.001$ . (D) Western blot analysis showing that CENP-C and CAL1 protein levels are not altered by the inhibitor treatment.

Table S1. **Primer sequences**

| Name       | Forward primer (5'–3')                                                                   | Reverse primer (5'–3')                      |
|------------|------------------------------------------------------------------------------------------|---------------------------------------------|
| 5S rDNA    | AAACTGTGCGTCATCGTGTG                                                                     | TGGACTGCGATATGCGTAAA                        |
| Actin      | TCGCCATCTAACCGACTACC                                                                     | AGTGCGGTGATTTCTTTT                          |
| 18S rDNA   | AGCCTGAGAAACGGCTACCA                                                                     | AGCTGGGAGTGGGTAATTTACG                      |
| SAT III    | TATTCTTACATCTATGTGACC                                                                    | GTTTTGAGCAGCTAATTACC                        |
| GFP_nostop | ATTCTCGAGCATGGTGAGCAAGGGCGAGGA                                                           | ATTCCGGGGGGCGCGGTACGAACTC                   |
| ERT2       | AAAGGATCCAGCCC GCGGAGCTATCCATACGATGTGCCGGAT<br>TACGCTGGCGATATGTCTGCTGGAGACATGAGAGCTGCCAA | TTTACCGTTTAAGCTGTGGCAGGAAACCTCTGCCTCCCCCGTG |
| Rpb3       | ATAGATATCCAAACCGCAATGCCGTACGCCAACC                                                       | AATGCGGCCGCTATGTAATCAAACGGCCAATGC           |

rDNA, ribosomal DNA.
